# Supplementary material for: Combined impact of healthy lifestyle factors on colorectal cancer: a large European cohort study
Source: BMC Med. 2014 Oct 10;12:168. doi: 10.1186/s12916-014-0168-4 (PMC4192278; doi:10.1186/s12916-014-0168-4)
Supplement: Additional file 2: Table S2. — Composition of the Diet Quality Index. [file 12916_2014_168_MOESM2_ESM.pdf]

**Table S2 :** Composition of the Diet Quality Index

| Dietary Factor |                        | Index | Description <sup>a</sup>                    |
|----------------|------------------------|-------|---------------------------------------------|
| <b>1</b>       | Fibre                  | 0     | < 23.5 g/d in men and < 21.5 g/d in women   |
|                |                        | 1     | ≥ 23.5 g/d in men and ≥ 21.5 g/d in women   |
| <b>2</b>       | Fruits                 | 0     | < 169.4 g/d in men and < 228.3 g/d in women |
|                |                        | 1     | ≥ 169.4 g/d in men and ≥ 228.3 g/d in women |
| <b>3</b>       | Vegetables             | 0     | < 160.1 g/d in men and < 185.9 g/d in women |
|                |                        | 1     | ≥ 160.1 g/d in men and ≥ 185.9 g/d in women |
| <b>4</b>       | Yoghurt                | 0     | < 15.8 g/d in men and < 35.8 g/d in women   |
|                |                        | 1     | ≥ 15.8 g/d in men and ≥ 35.8 g/d in women   |
| <b>5</b>       | Nuts                   | 0     | < 0.83 g/d in men and < 0.85 g/d in women   |
|                |                        | 1     | ≥ 0.83 g/d in men and ≥ 0.85 g/d in women   |
| <b>6</b>       | Garlic                 | 0     | < 10.8 g/d in men and < 8.1 g/d in women    |
|                |                        | 1     | ≥ 10.8 g/d in men and ≥ 8.1 g/d in women    |
| <b>7</b>       | Fish                   | 0     | < 22.2 g/d in men and < 18.6 g/d in women   |
|                |                        | 1     | ≥ 22.2 g/d in men and ≥ 18.6 g/d in women   |
| <b>8</b>       | Red and processed meat | 0     | ≥ 122.5 g/d in men and ≥ 85 g/d in women    |
|                |                        | 1     | < 122.5 g/d in men and < 85 g/d in women    |

<sup>a</sup>Cut-off points are based on sex-specific median dietary intakes in non-cases (n=343,478).
