# Supplementary material for: Combined impact of healthy lifestyle factors on colorectal cancer: a large European cohort study
Source: Springer Nature journal article supplement (doi:10.1186/s12916-014-0168-4), 2014-10-07
Supplement: MOESM1 [file 9758486]

**Table S1:** Ethical approval review board information for local EPIC centres

| <b>Center/Country</b> | <b>Ethical Review Board</b>                                                                                                                           |
|-----------------------|-------------------------------------------------------------------------------------------------------------------------------------------------------|
| Denmark               | The National Committee on Health Research Ethics                                                                                                      |
| France                | Comité de Protection des Personnes - France                                                                                                           |
| Heidelberg, Germany   | Ethics Committee of the Heidelberg University Medical School - Heidelberg, Germany                                                                    |
| Potsdam, Germany      | Ethikkommission der Landesärztekammer Brandenburg Cottbus - Potsdam, Germany                                                                          |
| Greece                | University of Athens Medical School - Athens, Greece                                                                                                  |
| Milan, Italy          | Comitato Etico Indipendente, Fondazione IRCCS Istituto Nazionale dei Tumori – Milano-Italy                                                            |
| Turn, Italy           | Human Genetics Foundation Torino: Ethics Committee - Turin, Italy                                                                                     |
| The Netherlands       | The Medical Ethical Committee (METC = Medisch Ethische Toetsingscommissie) of the University Medical Center Utrecht (UMCU), Utrecht - the Netherlands |
| Norway                | Regional ethical committee for Northern Norway and the Norwegian Data Inspectorate, Norway                                                            |
| Spain                 | CEIC Comité de Ética de Investigación Clínica - Spain                                                                                                 |
| Malmö, Sweden         | Ethics Committee of Lundst University - Malmö, Sweden                                                                                                 |
| Umea, Sweden          | Umea Regional Ethical Review Board - Umea, Sweden                                                                                                     |
| Cambridge, UK         | Norwich District Ethics Committee - Cambridge, UK                                                                                                     |
| Oxford, UK            | Scotland A Research Ethics Committee (Oxford); and the Imperial College Research Ethics Committee [ICREC] (UK).                                       |
